# Supplementary material
Source: ML conference proceedings conference paper supplement (https://proceedings.mlr.press/v54/khanna17b.html)
Supplement: Supplementary file 1 [file khanna17b-supp.pdf]

## A Proofs

In this section, we provide detailed proofs of all the results used in this manuscript. For lemma and theorem statements repeated from the main text, we add an apostrophe to indicate that it is not a new lemma/theorem being introduced.

We make use of the following result that provides an approximation bound for greedy selections for weakly submodular functions.

**Lemma 10.** [Das and Kempe, 2011] *Let  $S^*$  be the optimal  $k$ -sized set that maximizes  $f(\cdot)$  under the  $k$ -sparsity constraint (see (2)). Let  $S_G$  be the set returned by greedy forward selection (Algorithm 1), then*

$$f(S_G) \geq (1 - \exp(-\gamma_{S_G, k}))f(S^*).$$

### A.1 Distributed Greedy

**Lemma' 2.**  $f(G_j) \geq (1 - \exp(-\gamma_{G_j, k}))f(T_j)$ .

*Proof.* From Lemma 1, we know that running greedy on  $A_j \cup T_j$  instead of  $A_j$  will still return the set  $G_j$ ,

$$\begin{aligned} f(G_j) &\stackrel{\text{Lemma 10}}{\geq} (1 - \exp(-\gamma_{G_j, k})) \max_{\substack{|S| \leq k \\ S \subset A_j \cup T_j}} f(S) \\ &\geq (1 - \exp(-\gamma_{G_j, k}))f(T_j). \end{aligned}$$

□

For proving Lemma 3, we require another auxillary result.

**Lemma 11.** *For any  $x \in A$ ,  $\mathbb{P}(x \in \cup_j G_j) = \frac{1}{l} \sum_j \mathbb{P}(x \in S_j)$ .*

*Proof.* We have

$$\begin{aligned} &\mathbb{P}(x \in \cup_j G_j) \\ &= \sum_j \mathbb{P}(x \in A_i \cap x \in \text{GREEDY}(A_i, k)) \\ &= \sum_j \mathbb{P}(x \in A_i) \mathbb{P}(x \in \text{GREEDY}(A_i, k) | x \in A_i) \\ &= \sum_j \mathbb{P}(x \in A_i) \mathbb{P}(x \in S_i) \\ &= \frac{1}{l} \mathbb{P}(x \in S_i). \end{aligned}$$

□

We now prove Lemma 3.

**Lemma' 3.**  $\exists j \in [l], \mathbb{E}[f(G)] \geq (1 - \frac{1}{e^{\gamma_{G, k}}}) f(S_j)$ .

*Proof.* For  $i \in [k]$ , let  $B_i : \text{GREEDY}(\cup_j G_j, i)$ , so that  $B_k = G$  in step 3 of Algorithm 2. Then,

$$\begin{aligned} &\mathbb{E}[f(B_{i+1}) - f(B_i)] \\ &\geq \frac{1}{k} \sum_{x \in A^*} \mathbb{P}(x \in \cup_j G_j) \mathbb{E}[f(B_i \cup x) - f(B_i)] \\ &\stackrel{\text{Lemma 11}}{=} \frac{1}{kl} \sum_{x \in A^*} \left( \sum_{j=1}^l \mathbb{P}(x \in S_j) \right) \mathbb{E}(f(B_i \cup x) - f(B_i)) \\ &= \frac{1}{kl} \sum_{j=1}^l \sum_{x \in S_j} \mathbb{E}(f(B_i \cup x) - f(B_i)) \\ &= \frac{1}{kl} \sum_{j=1}^l \gamma_{B_i, S_j \setminus B_i} \mathbb{E}(f(B_i \cup S_j) - f(B_i)) \\ &\geq \frac{1}{kl} \sum_{j=1}^l \gamma_{B_i, S_j \setminus B_i} \mathbb{E}(f(S_j) - f(B_i)) \\ &\geq \frac{\gamma_{B_i, k}}{k} \min_j \mathbb{E}(f(S_j) - f(B_i)). \end{aligned} \tag{13}$$

Using  $\gamma_{B_i, k} \geq \gamma_{G, k}$ , and proceeding now as in the proof of Theorem 2, we get the desired result. □

### A.2 Stochastic Greedy

**Lemma' 4.** *Let  $A, B \subset [n]$ , with  $|B| \leq k$ . Consider another set  $C$  drawn randomly from  $[n] \setminus A$  with  $|C| = \lceil \frac{n \log^{1/\delta}}{k} \rceil$ . Then*

$$\mathbb{E}[\max_{v \in C} f(v \cup A) - f(A)] \geq \frac{(1 - \delta) \gamma_{A, B \setminus A}}{k} (f(B) - f(A)).$$

*Proof.* To relate the best possible marginal gain from  $C$  to the total gain of including the set  $B \setminus A$  into  $A$ , we must upper bound the probability of overlap between  $C$  and  $B \setminus A$  as follows:

$$\begin{aligned} \mathbb{P}(C \cap (B \setminus A) \neq \emptyset) &= 1 - \left(1 - \frac{|B \setminus A|}{|[n] \setminus A|}\right)^{|C|} \\ &= 1 - \left(1 - \frac{|B \setminus A|}{|[n] \setminus A|}\right)^{\lceil \frac{n \log^{1/\delta}}{k} \rceil} \\ &\geq 1 - \exp\left(-\frac{n \log^{1/\delta}}{k} \frac{|B \setminus A|}{|[n] \setminus A|}\right) \\ &\geq 1 - \exp\left(-\frac{|B \setminus A| \log^{1/\delta}}{k}\right) \\ &\geq (1 - \exp(-\log^{1/\delta})) \frac{|B \setminus A|}{k} \tag{14} \\ &= (1 - \delta) \frac{|B \setminus A|}{k}, \end{aligned}$$

where (14) is because  $\frac{|B \setminus A|}{k} \leq 1$ . Let  $S = C \cap (B \setminus A)$ . Since

$f(v \cup A) - f(A)$  is nonnegative,

$$\begin{aligned}
 & \mathbb{E}[\max_{v \in C} f(v \cup A) - f(A)] \\
 & \geq \mathbb{P}(S \neq \emptyset) \mathbb{E}[\max_{v \in C} f(v \cup A) - f(A) | S \neq \emptyset] \\
 & \geq (1 - \delta) \frac{|B \setminus A|}{k} \mathbb{E}[\max_{v \in C} f(v \cup B) - f(B) | S \neq \emptyset] \\
 & \geq (1 - \delta) \frac{|B \setminus A|}{k} \mathbb{E}[\max_{v \in C \cap (B \setminus A)} f(v \cup A) - f(A) | S \neq \emptyset] \\
 & \geq (1 - \delta) \frac{|B \setminus A|}{k} \sum_{v \in B \setminus A} \frac{f(v \cup A) - f(A)}{|B \setminus A|} \\
 & \geq \frac{(1 - \delta) \gamma_{A, B \setminus A}}{k} (f(B) - f(A)).
 \end{aligned}$$

□

### A.3 Linear regression

**Lemma' 6.** For the maximization of the  $R^2$  (7)  $v_S \geq \frac{\lambda_{\min}(C_S)}{\lambda_{\max}(C_S)}$ , where  $C_S$  is the submatrix of  $C$  with rows and columns indexed by  $S$ .

*Proof.* Say  $A, B$  is an arbitrary partition of  $S$ . Consider,

$$\begin{aligned}
 \|\mathbf{P}_{A\mathbf{Y}}\|_2^2 &= \mathbf{y}^\top \mathbf{P}_A \mathbf{y} \\
 &= \mathbf{y}^\top \mathbf{X}_A (\mathbf{X}_A^\top \mathbf{X}_A)^{-1} \mathbf{X}_A^\top \mathbf{y} \\
 &\geq \|\mathbf{X}_A^\top \mathbf{y}\|_2^2 \lambda_{\min}((\mathbf{X}_A^\top \mathbf{X}_A)^{-1}) \\
 &= \|\mathbf{X}_A^\top \mathbf{y}\|_2^2 \frac{1}{\lambda_{\max}(\mathbf{X}_A^\top \mathbf{X}_A)} \\
 &\geq \|\mathbf{X}_A^\top \mathbf{y}\|_2^2 \frac{1}{\lambda_{\max}(\mathbf{X}_S^\top \mathbf{X}_S)}.
 \end{aligned} \tag{15}$$

where (15) results from the fact that all orthogonal projection matrices are symmetric and idempotent. Repeating a similar analysis for  $B$  instead of  $A$ , we get

$$\begin{aligned}
 \|\mathbf{P}_{A\mathbf{Y}}\|_2^2 + \|\mathbf{P}_{B\mathbf{Y}}\|_2^2 &\geq \frac{\|\mathbf{X}_A^\top \mathbf{y}\|_2^2 + \|\mathbf{X}_B^\top \mathbf{y}\|_2^2}{\lambda_{\max}(\mathbf{X}_S^\top \mathbf{X}_S)} \\
 &= \frac{\|\mathbf{X}_S^\top \mathbf{y}\|_2^2}{\lambda_{\max}(\mathbf{X}_S^\top \mathbf{X}_S)}.
 \end{aligned}$$

A similar analysis also gives  $\|\mathbf{P}_S \mathbf{y}\|_2^2 \leq \frac{\|\mathbf{X}_S \mathbf{y}\|_2^2}{\lambda_{\min}(\mathbf{X}_S^\top \mathbf{X}_S)}$ , which gives the desired result. □

### A.4 RSC implies weak subadditivity

Let  $\beta^{(S)} := \max_{\text{supp}(\mathbf{x}) \in S} g(\mathbf{x})$ .

**Lemma' 8.** For a support set  $S \subset [d]$ ,  $f(S) \geq \frac{1}{2L} \|\nabla g(\mathbf{0})_S\|_2^2$ .

*Proof.* For any  $\mathbf{v}$  with support in  $S$ ,

$$\begin{aligned}
 g(\beta^{(S)}) - g(\mathbf{0}) &\geq g(\mathbf{v}) - g(\mathbf{0}) \\
 &\geq \langle \nabla g(\mathbf{0}), \mathbf{v} \rangle - \frac{L}{2} \|\mathbf{v}\|_2^2.
 \end{aligned}$$

Using  $\mathbf{v} = \frac{1}{L} \nabla g(\mathbf{0})_S$ , we get the desired result. □

**Lemma' 9.** For any support set  $S$ ,  $f(S) \leq \frac{1}{2m} \|\nabla g(\mathbf{0})_S\|_2^2$ .

*Proof.* By strong concavity,

$$\begin{aligned}
 g(\beta^{(S)}) - g(\mathbf{0}) &\leq \langle \nabla g(\mathbf{0}), \beta^{(S)} \rangle - \frac{m}{2} \|\beta^{(S)}\|_2^2 \\
 &\leq \max_{\mathbf{v}} \langle \nabla g(\mathbf{0}), \mathbf{v} \rangle - \frac{m}{2} \|\mathbf{v}\|_2^2,
 \end{aligned}$$

where  $\mathbf{v}$  is an arbitrary vector that has support only on  $S$ . Optimizing the RHS over  $\mathbf{v}$  gives the desired result. □

## B Additional experiments

Figures 4,5 shows the performance of all algorithms on the following metrics: log likelihood (normalized with respect to a null model), generalization to new test measurements from the same true support parameter, area under ROC, and percentage of the true support recovered for  $l = 2$ . Recall that Figure 1 presents the results from the same experiment with  $l = 10$ . Clearly, the greedy algorithms benefit more from increased number of partitions.

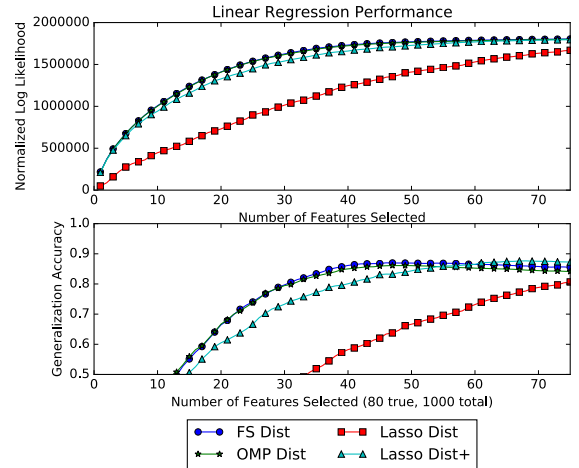

Figure 4: Distributed linear regression,  $l = 2$  partitions,  $n = 800$  training and test samples,  $\alpha = 0.5$ . Training/testing performance

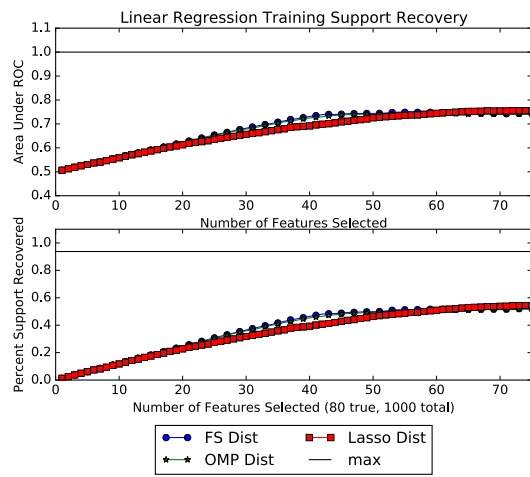

Figure 5: Distributed linear regression,  $l = 2$  partitions,  $n = 800$  training and test samples,  $\alpha = 0.5$ . Support Recovery Performance
